# Supplementary material for: Circulating Serum MiRNA-8074 as a Novel Prognostic Biomarker for Multiple Myeloma
Source: MDPI journal article supplement (doi:10.3390/cells11040752), 2022-02-21
Supplement: s1 [file s1]

# Supplementary materials

**Table S1.** Comparison of the *miR-8074* expression depending on demographic, clinical and molecular factors.

| Variable                        | <i>miR-8074</i> | <i>P</i> |
|---------------------------------|-----------------|----------|
|                                 | <i>Me</i>       |          |
|                                 | 0.88            |          |
| <b>Sex</b>                      |                 |          |
| Men                             | 0.69            | 0.4788   |
| Women                           | 2.02            |          |
| <b>Age</b>                      |                 |          |
| <65                             | 2.08            | 0.8677   |
| ≥65                             | 0.79            |          |
| <b>Diagnosis</b>                |                 |          |
| MM with a monoclonal component  | 1.42            | 0.7774   |
| Light chain disease             | 0.54            |          |
| <b>Monoclonal protein class</b> |                 |          |
| IgA                             | 3.11            | 0.3803   |
| IgG                             | 0.79            |          |
| <b>Light chain type</b>         |                 |          |
| Kappa                           | 0.63            | 0.2926   |
| Lambda                          | 2.13            |          |
| <i>No data: n=1</i>             |                 |          |
| <b>Durie-Salmon stage</b>       |                 |          |
| I                               | 2.80            | 0.4108   |
| II                              | 2.36            |          |
| III                             | 0.57            |          |
| <b>ISS stage</b>                |                 |          |
| 1                               | 0.49            | 0.8241   |
| 2                               | 1.80            |          |
| 3                               | 1.26            |          |
| <i>No data: n=1</i>             |                 |          |
| <b>Renal function</b>           |                 |          |
| A - creatinine < 2 mg/dL        | 1.59            | 0.7306   |
| B - creatinine ≥ 2 mg/dL        | 0.55            |          |
| <b>Performance status</b>       |                 |          |
| 0                               | 0.39            | 0.4151   |
| 1                               | 0.41            |          |
| 2                               | 1.95            |          |
| 3                               | 4.36            |          |
| 4                               | 6.26            |          |
| <b>Body weight loss</b>         |                 |          |
| No                              | 0.46            | 0.3425   |
| Yes                             | 1.78            |          |
| <i>No data: n=20</i>            |                 |          |
| 5%                              | 2.06            | 0.3121   |
| 10%                             | 0.59            |          |
| <b>Anemia grade (WHO)</b>       |                 |          |
| Absent or I°                    | 0.26            | 0.2266   |
| II°, III° or IV°                | 1.60            |          |
| <b>Treatment protocol</b>       |                 |          |
| CTD                             | 1.61            | 0.5759   |
|                                 | 0.72            |          |

|                                     |      |        |
|-------------------------------------|------|--------|
| V(C)D                               | 1.88 |        |
| VTD                                 |      |        |
| <b>del (17p)</b>                    |      |        |
| Absent                              | 0.84 | 0.5085 |
| Present                             | 0.41 |        |
| No data: n=20                       |      |        |
| <b>t(4;14)</b>                      |      |        |
| Absent                              | 0.81 | 0.9674 |
| Present                             | 0.52 |        |
| No data: n=20                       |      |        |
| <b>t(14;16)</b>                     | 0.75 |        |
| Absent                              | 1.61 | -      |
| Present                             |      |        |
| No data: n=20                       |      |        |
| <b>t(11;14)</b>                     |      |        |
| Absent                              | 1.42 | 0.2971 |
| Present                             | 0.20 |        |
| No data: n=20                       |      |        |
| <b>Other IgH gene rearrangement</b> |      |        |
| Absent                              | 0.64 | 0.9173 |
| Present                             | 1.88 |        |
| No data: n=20                       |      |        |

CTD - cyclophosphamide, thalidomide, dexamethasone; ISS - Multiple Myeloma International Staging System; *Me* – median, *p* - statistical significance, WHO - World Health Organization; V(C)D - bortezomib, (cyclophosphamide), dexamethasone; VTD - bortezomib, thalidomide, dexamethasone.

**Table S2.** Spearman's rank correlation between selected demographic, clinical and molecular variables and *miR-8074* expression.

| Variable                          | <i>miR-8074</i> expression |        |
|-----------------------------------|----------------------------|--------|
|                                   | rho                        | P      |
| Age [years]                       | 0.0421                     | 0.6701 |
| Serum monoclonal protein (g/dl)   | 0.112                      | 0.6286 |
| Serum light chain (mg/l)          | 0.161                      | 0.4743 |
| Durie-Salmon stage                | -0.128                     | 0.1940 |
| ISS stage                         | 0.0260                     | 0.7930 |
| Kidney disease A/B                | -0.121                     | 0.2190 |
| Performance status                | 0.189                      | 0.0583 |
| BMI                               | 0.0172                     | 0.8852 |
| Weight loss [%]                   | 0.104                      | 0.3455 |
| Haemoglobin [g/dl]                | -0.114                     | 0.2483 |
| Anaemia grade (WHO)               | 0.119                      | 0.2283 |
| Lymphocytes [K/ul]                | 0.0753                     | 0.4452 |
| Neutrophils [K/ul]                | -0.0319                    | 0.7469 |
| Neutrophil to lymphocyte ratio    | -0.0694                    | 0.4839 |
| Platelets [K/ul]                  | 0.0557                     | 0.5722 |
| MPV [fl]                          | -0.102                     | 0.2992 |
| Number of lytic foci in the bones | -0.0757                    | 0.4449 |
| eGFR [mL/min/1.73m <sup>2</sup> ] | 0.0838                     | 0.3974 |
| Stage of chronic kidney disease   | -0.121                     | 0.2190 |
| Albumins [mg/dl]                  | -0.159                     | 0.1045 |

|                                               |          |        |
|-----------------------------------------------|----------|--------|
| <b>Creatinine [mg/dl]</b>                     | -0.0860  | 0.3832 |
| <b>B2M [ng/l]</b>                             | 0.0502   | 0.6144 |
| <b>LDH [IU/l]</b>                             | -0.0389  | 0.7049 |
| <b>Calcium [mmol/l]</b>                       | -0.0172  | 0.8619 |
| <b>CRP [mg/l]</b>                             | 0.0352   | 0.7231 |
| <b>del (17p) [% cell.]</b>                    | -0.0721  | 0.4169 |
| <b>t(4;14) [% cell.]</b>                      | -0.00447 | 0.9537 |
| <b>t(14;16) [% cell.]</b>                     | -0.114   | 0.8235 |
| <b>t(11;14) [% cell.]</b>                     | -0.114   | 0.2018 |
| <b>Other IgH gene rearrangement [% cell.]</b> | -0.0113  | 0.8937 |

auto HSCT - autologous hematopoietic stem cell transplant, B2M – beta-2-microglobulin, , CRP – C-reactive protein, eGFR – estimated glomerular filtration rate, ISS - Multiple Myeloma International Staging System, LDH - lactate dehydrogenase, MPV – mean platelet volume, *p* - statistical significance, rho- Spearman's rank correlation coefficient, WHO - World Health Organization.

**Table S3.** Comparison and assessment of the usefulness of the *miRNA-8074* expression level in differentiating CTH responses.

| Variable                             | <i>miRNA-8074</i> expression |                       |                |             |             |                   | <i>p</i> <sup>b</sup> |
|--------------------------------------|------------------------------|-----------------------|----------------|-------------|-------------|-------------------|-----------------------|
|                                      | <i>Me</i>                    | <i>p</i> <sup>a</sup> | cut-off        | Sensitivity | Specificity | AUC (95%CI)       |                       |
| <b>Response after 2 cycle of CTH</b> | <b>0.79</b>                  | 0.5511                | > <b>0.539</b> | 71.43%      | 48.84%      | 0.550 (0.45-0.65) | 0.5229                |
| No                                   | <b>3.08</b>                  |                       |                |             |             |                   |                       |
| Yes                                  |                              |                       |                |             |             |                   |                       |
| <b>Response after 4 cycle of CTH</b> | <b>0.66</b>                  | 0.3918                | > <b>0.539</b> | 85.71%      | 50.00%      | 0.598 (0.49-0.70) | 0.2285                |
| No                                   | <b>1.26</b>                  |                       |                |             |             |                   |                       |
| Yes                                  |                              |                       |                |             |             |                   |                       |
| <b>Response after 6 cycle of CTH</b> | <b>0.79</b>                  | 0.5568                | > <b>0.108</b> | 100.00%     | 35.53%      | 0.572 (0.46-0.68) | 0.5172                |
| No                                   | <b>0.56</b>                  |                       |                |             |             |                   |                       |
| Yes                                  |                              |                       |                |             |             |                   |                       |
| <b>Response after 8 cycle of CTH</b> | <b>1.61</b>                  | 0.7359                | > <b>0.078</b> | 100.00%     | 33.33%      | 0.548 (0.36-0.72) | 0.7149                |
| No                                   | <b>0.72</b>                  |                       |                |             |             |                   |                       |
| Yes                                  |                              |                       |                |             |             |                   |                       |

AUC – area under curve, CI – confidence interval, CTH – chemotherapy, *Me* -median, *p* - statistical significance.

Response: CR= complete response, VGPR = very good partial response, PR = partial response, MR = minimal response; Lack of response: SD = stable disease, PD - progressive disease.

Response criteria adapted from Durie et al (2006) [16].

<sup>a</sup> – *p* value for U-Mann-Whitney test, <sup>b</sup> – *p* value for ROC analysis.

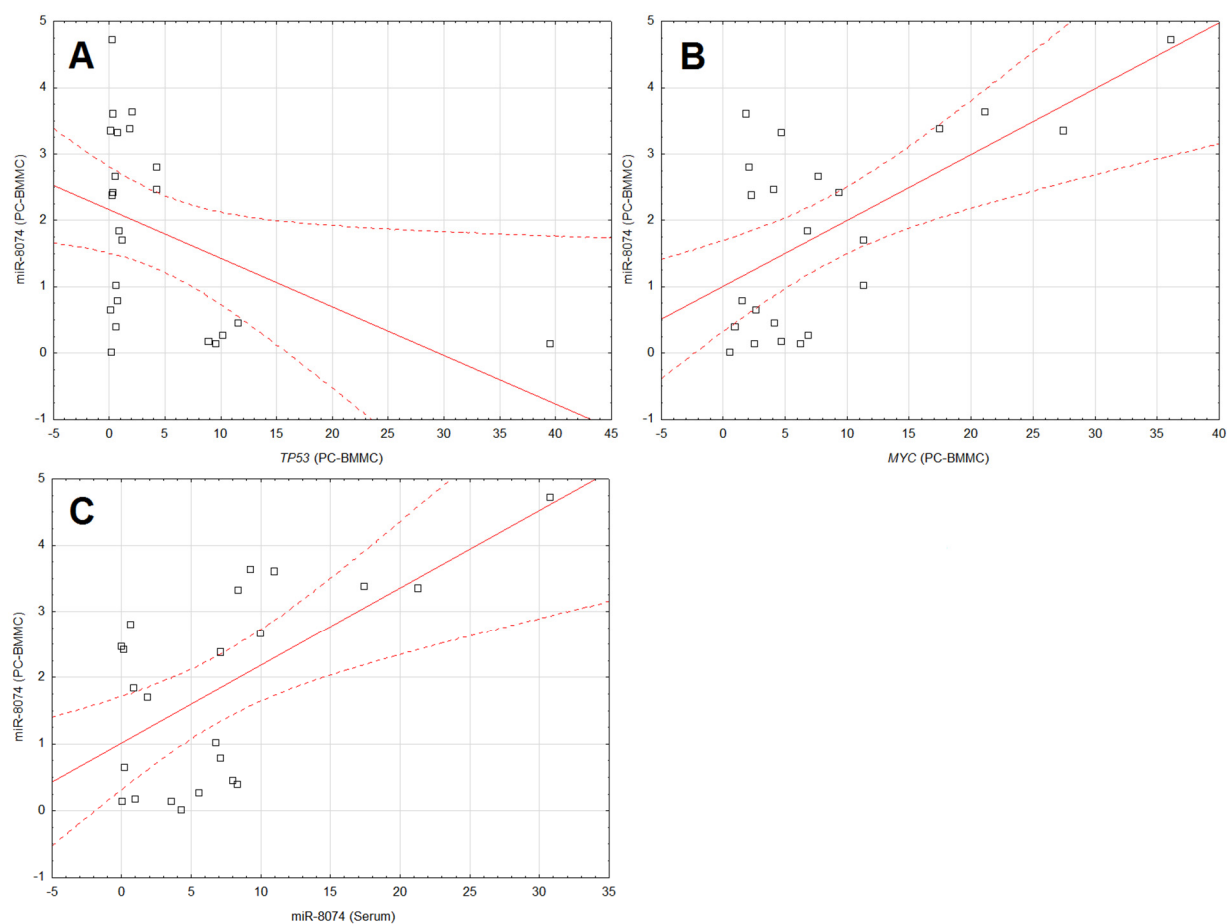

**Figure S1.** Scatter plots representing correlations between the expression of miRNA-8074, *TP53* gene [A] and *MYC* gene [B] in bone marrow plasma cells as well as with the expression of miRNA-8074 in blood serum [C].
